# Supplementary material for: A new family of StART domain proteins at membrane contact sites has a role in ER-PM sterol transport
Source: eLife journal article supplement (doi:10.7554/elife.07253), 2015-05-21
Supplement: supp [file elife-07253-supp-v1.zip]

## Figure 3-Figure Supplement 6

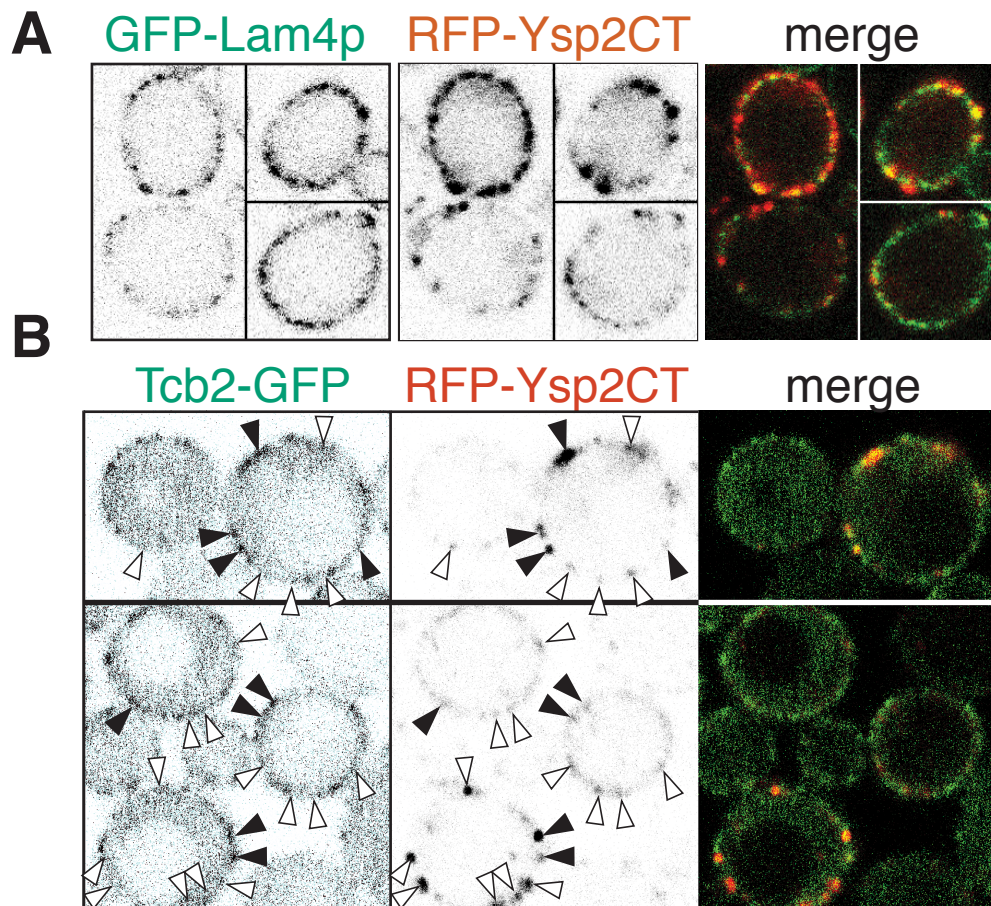

**Figure 3-Figure Supplement 6: Ysp2 colocalizes partially with Lam4p but not significantly with Tcb2p**

**A.** Co-expression of GFP-Lam4p with RFP-Ysp2CT, with separate channels as inverted grey-scale images, and the merge. ~50% of puncta with Ysp2CT contained Lam4p and vice versa, indicating partial but significant overlap. **B.** Wild-type cells co-expressing Tcb2-GFP and RFP-Lam2CT, shown as single channels (inverted grey-scale) and merge. Lam2CT+ve puncta (middle panels) are marked with arrowheads: filled if Tcb2-GFP is also enriched at that site, otherwise empty. ~33% of Ysp2CT puncta also contained Tcb2-GFP. The proportion of the periphery overall that contained Tcb2-GFP was  $\geq 25\%$ , so the co-localization between the two proteins was not significant.
