# Supplementary material for: A new family of StART domain proteins at membrane contact sites has a role in ER-PM sterol transport
Source: eLife journal article supplement (doi:10.7554/elife.07253), 2015-05-21
Supplement: supp [file elife-07253-supp-v1.zip]

## Figure 3-Figure Supplement 2

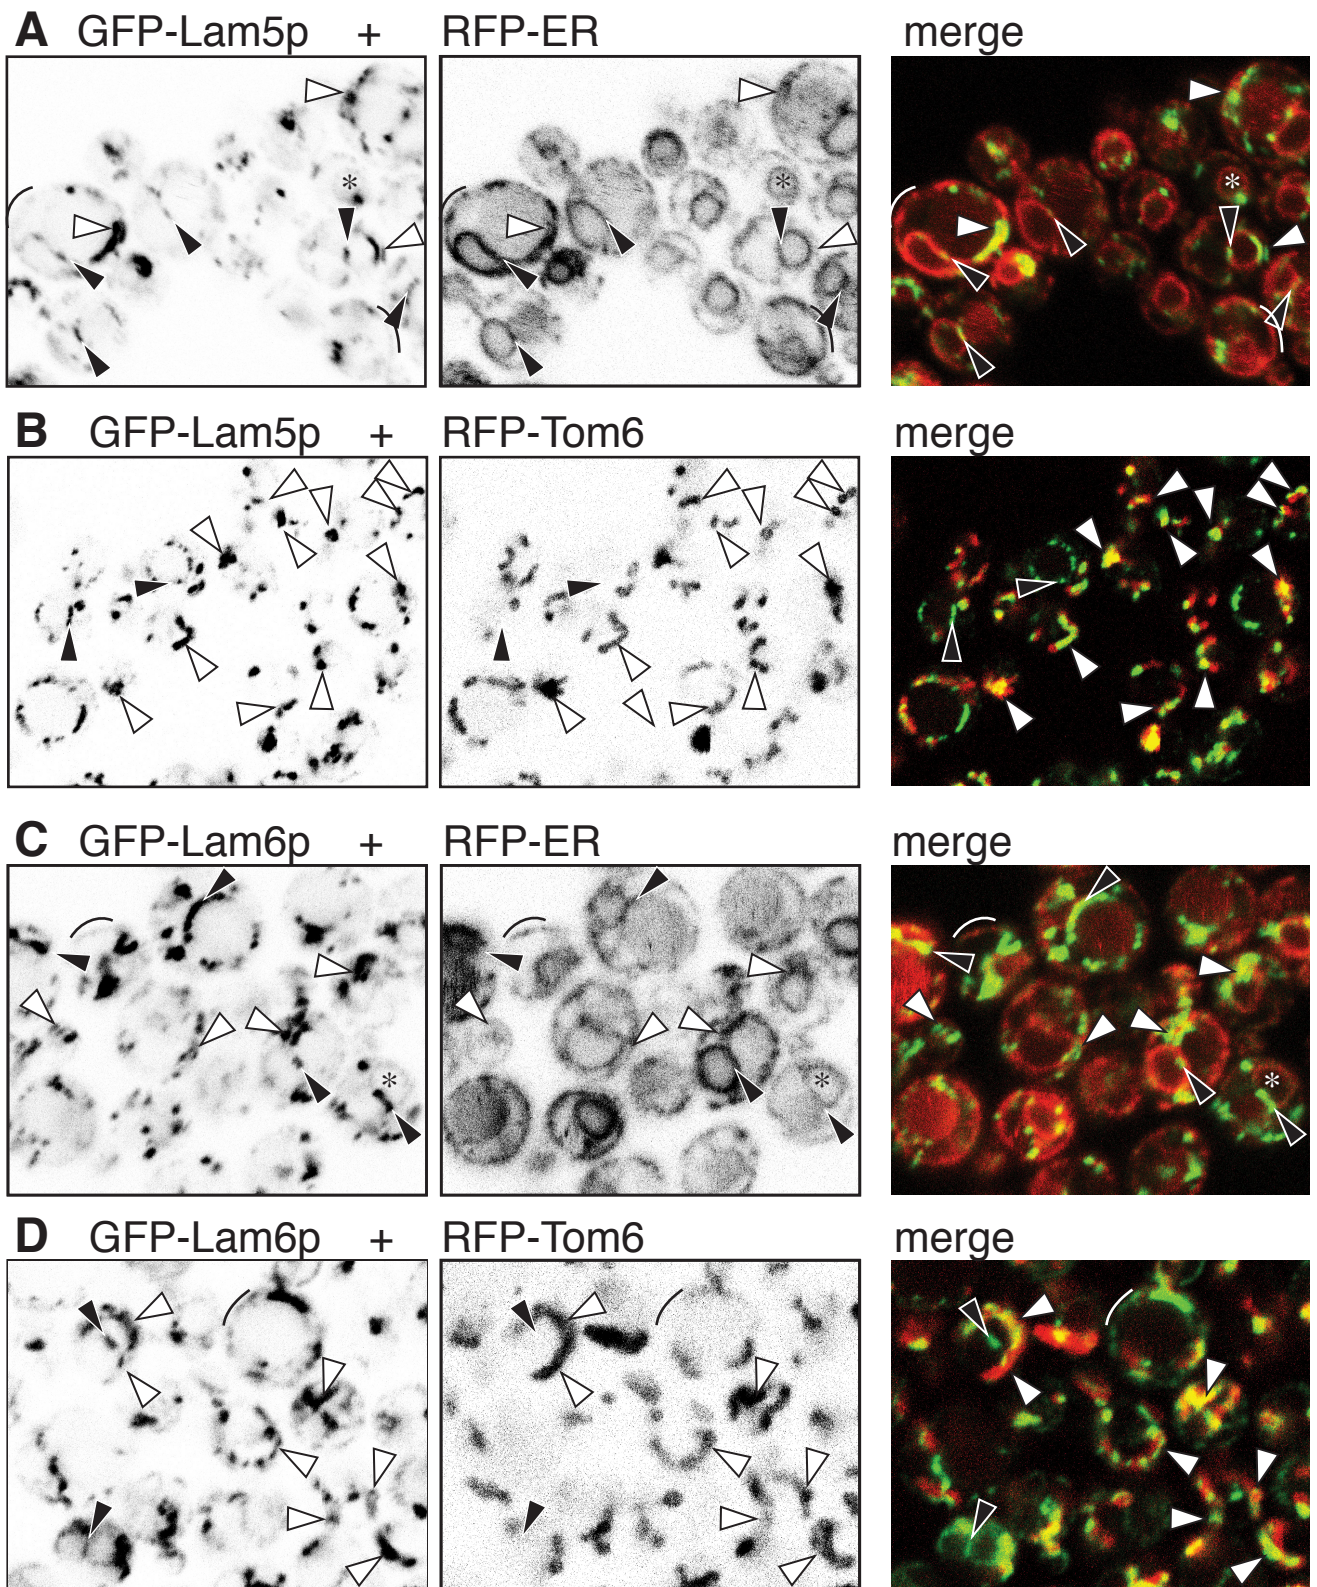

**Figure 3-Figure Supplement 2: GFP-Lam5p and -Lam6p target the NVJ and ER-mitochondrial contact sites**

**A–D:** LEFT panels: GFP-Lam5p (A & B) and GFP-Lam6p (C & D) in cells co-expressing MIDDLE panels: RFP-ER (A & C) or RFP-mitochondrial outer membrane (Tom6p) (B & D). RIGHT = merged images. Targeting by either GFP-tagged protein is indicated: NVJ (black filled arrowheads); mitochondrial outer membrane, sometimes seen as parallel lines (white filled arrowheads); generic ER (faint); nuclear envelope (asterisks), periphery (arcs).
