# Supplementary material for: A new family of StART domain proteins at membrane contact sites has a role in ER-PM sterol transport
Source: eLife journal article supplement (doi:10.7554/elife.07253), 2015-05-21
Supplement: supp [file elife-07253-supp-v1.zip]

## Figure 3-Figure Supplement 4

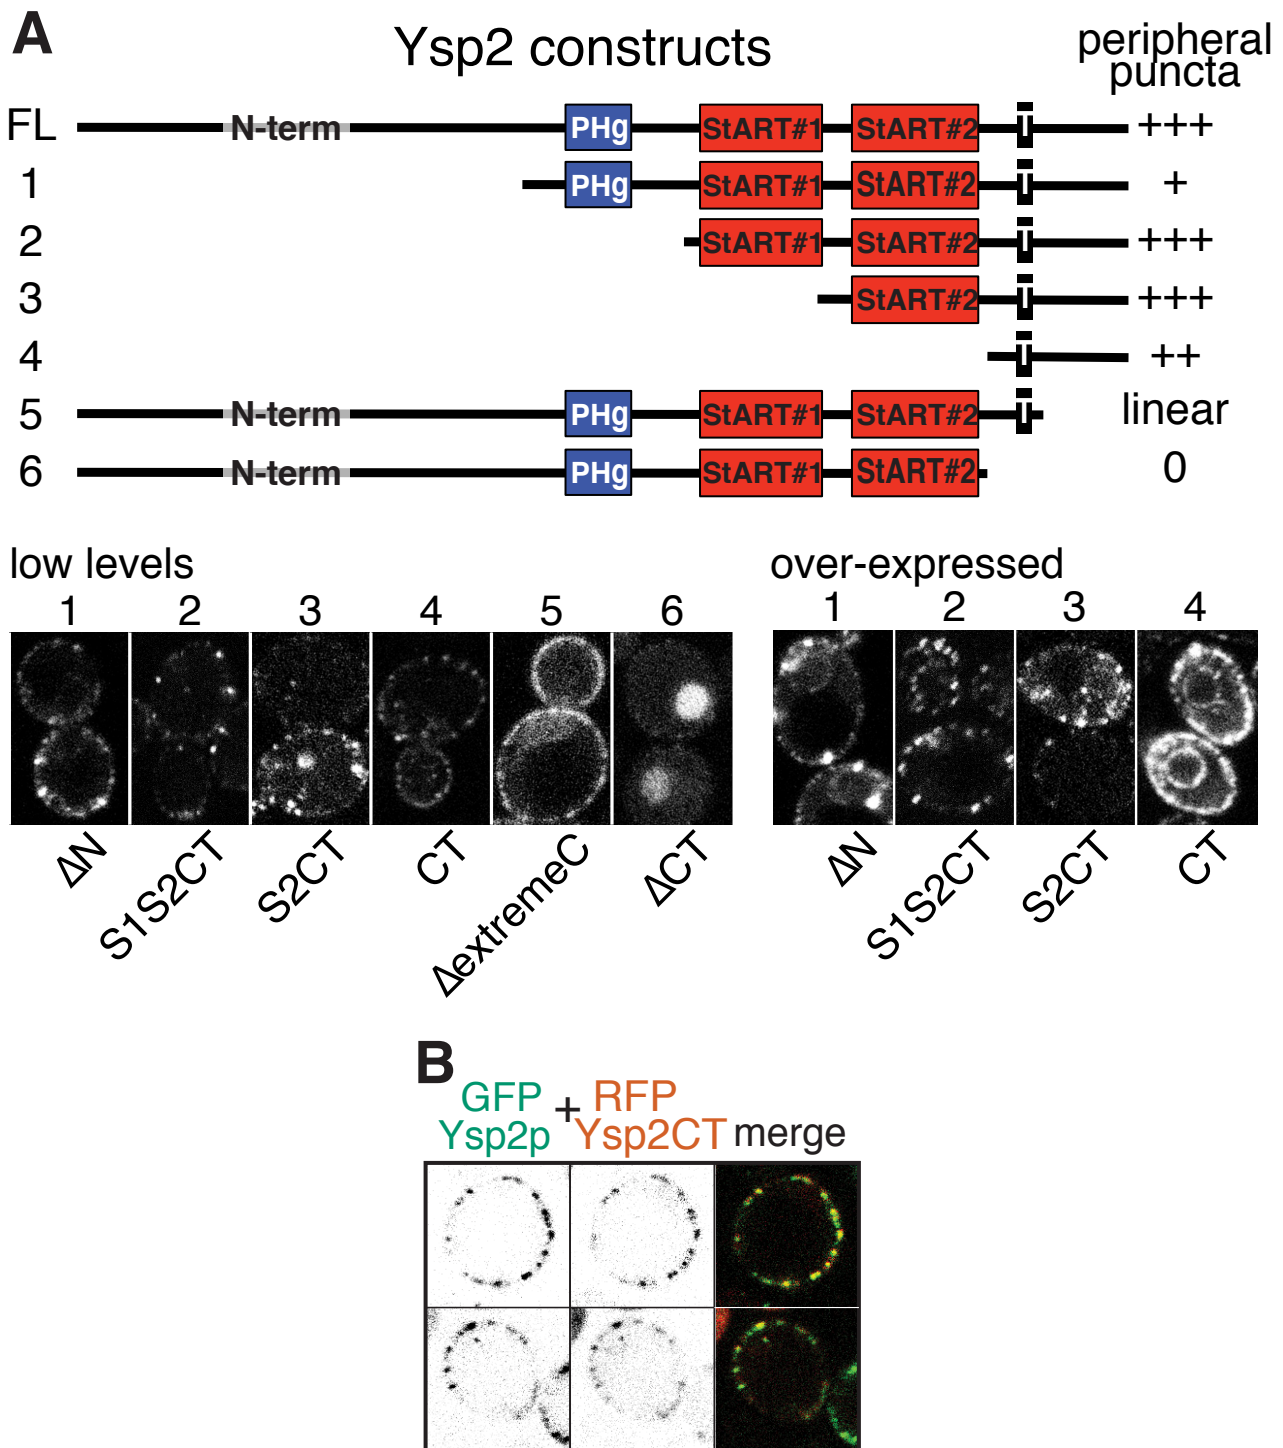

### Figure 3-Figure Supplement 4: Analysis of punctate targeting by Ysp2p

**A.** Cells expressing the six indicated Ysp2 constructs, all with N-terminal GFP. TOP: diagram of constructs and degree of targeting to peripheral puncta. Domains are identified as in Fig 1A, along with the N-terminus (residues 1-608), which is predicted to be unstructured. BOTTOM: LEFT: low level expression. Construct 6 ( $\Delta$ CT) lacks the TMD and is diffuse in the cytoplasm and nucleus. RIGHT high level expression of constructs 1-4. Ysp2-carboxy terminus (CT = 194 aa, incl. TMD and luminal domain) is sufficient for targeting to peripheral puncta, but the construct is in general ER (incl. nuclear envelope) when highly expressed. **B.** Co-expression of GFP-Ysp2p with RFP-Ysp2CT, with separate channels (grey scale) and merge showing almost 100% colocalization.
