# Supplementary material for: A new family of StART domain proteins at membrane contact sites has a role in ER-PM sterol transport
Source: eLife journal article supplement (doi:10.7554/elife.07253), 2015-05-21
Supplement: supp [file elife-07253-supp-v1.zip]

## Figure 3–Figure Supplement 5

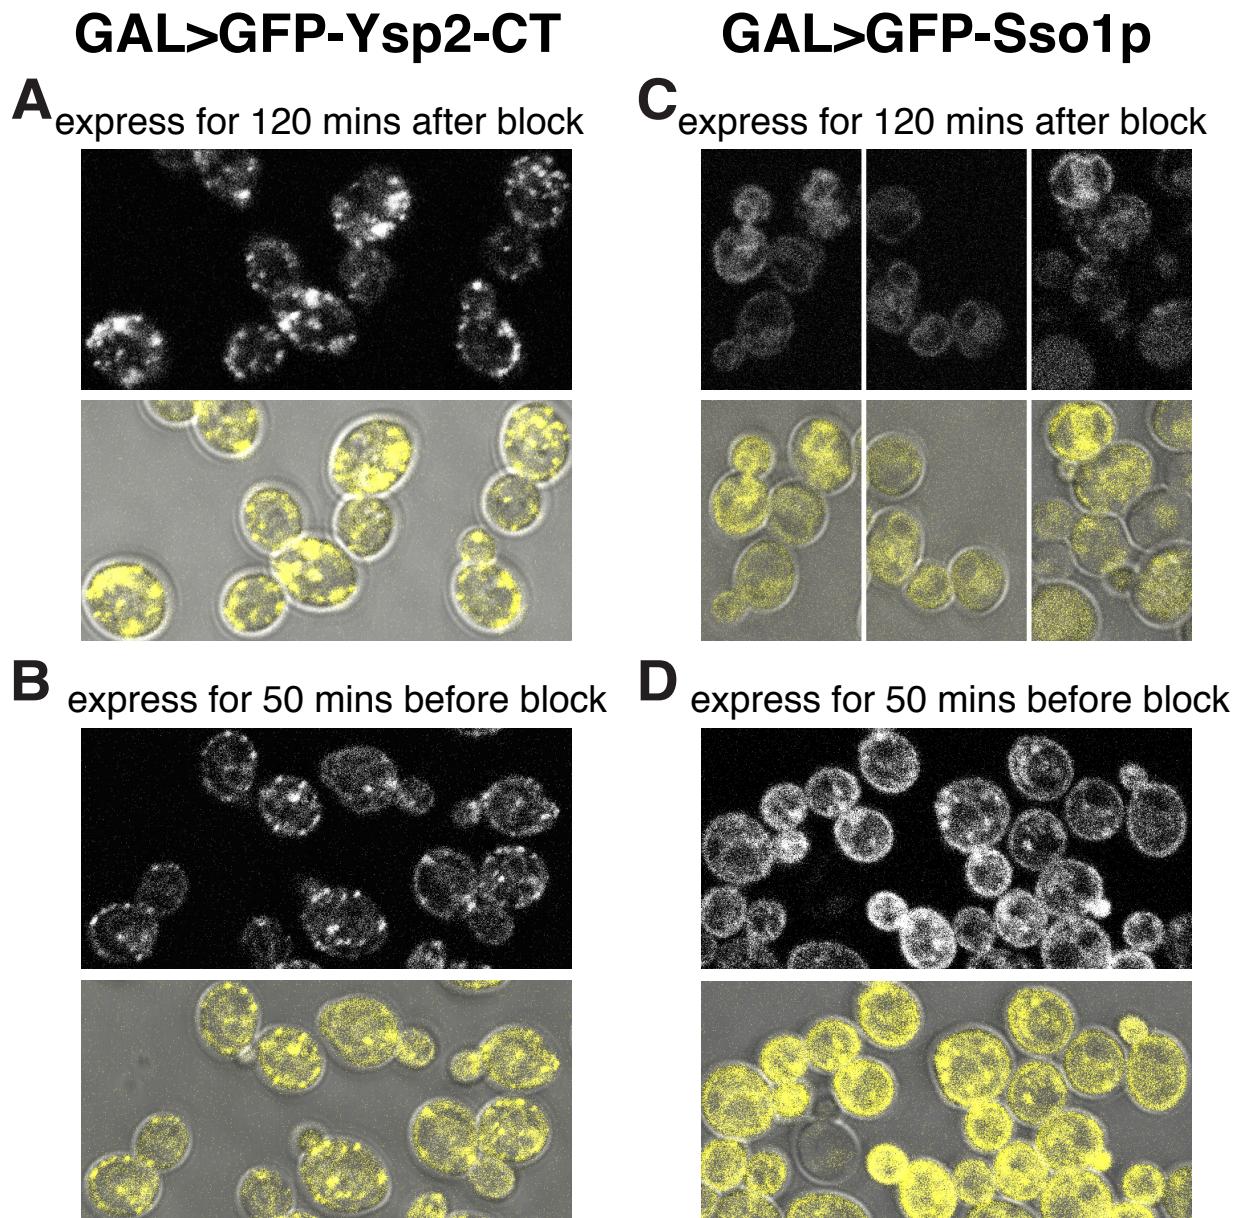

**Figure 3–Figure Supplement 5: Ysp2CT targets peripheral puncta after imposition of *sec18-1* blockade to SNARE-mediated transport**

**A and B.** *sec18-1* cells (RSY271) expressing GFP-Ysp2CT from the *GAL1* promoter. **A:** growth at 37°C for 10 minutes, then 120 minutes induction (addition 1% galactose); **B:** induction for 50 minutes with 1% galactose at the permissive temperature (25°C), then cells were washed into dextrose containing growth medium (to stop transcription) and grown for 10 minutes further at 25°C before temperature shift to 37°C for 60 minutes. **C and D.** As A and B respectively, except expressing GFP-Sso1p. In all panels, the lower images show GFP falsely coloured yellow superimposed on DIC images of cells to indicate the relationship between puncta and the cell periphery.

GFP-Ysp2CT reached peripheral puncta when expressed after the temperature shift blocked secretion (A), and its expression levels were lower when the induction period was shorter (B). In contrast GFP-Sso1p was found in the ER (including nuclear envelope and cortical patches) when expressed after blocking Sec18-mediated secretion (C), but otherwise reached the plasma membrane (with some punctate internal staining) and was expressed at higher levels despite the shorter induction (D), indicating that Sso1p destabilized by the *sec18-1* block.
