# Supplementary material for: A new family of StART domain proteins at membrane contact sites has a role in ER-PM sterol transport
Source: eLife journal article supplement (doi:10.7554/elife.07253), 2015-05-21
Supplement: supp [file elife-07253-supp-v1.zip]

### Figure 3-Figure Supplement 3

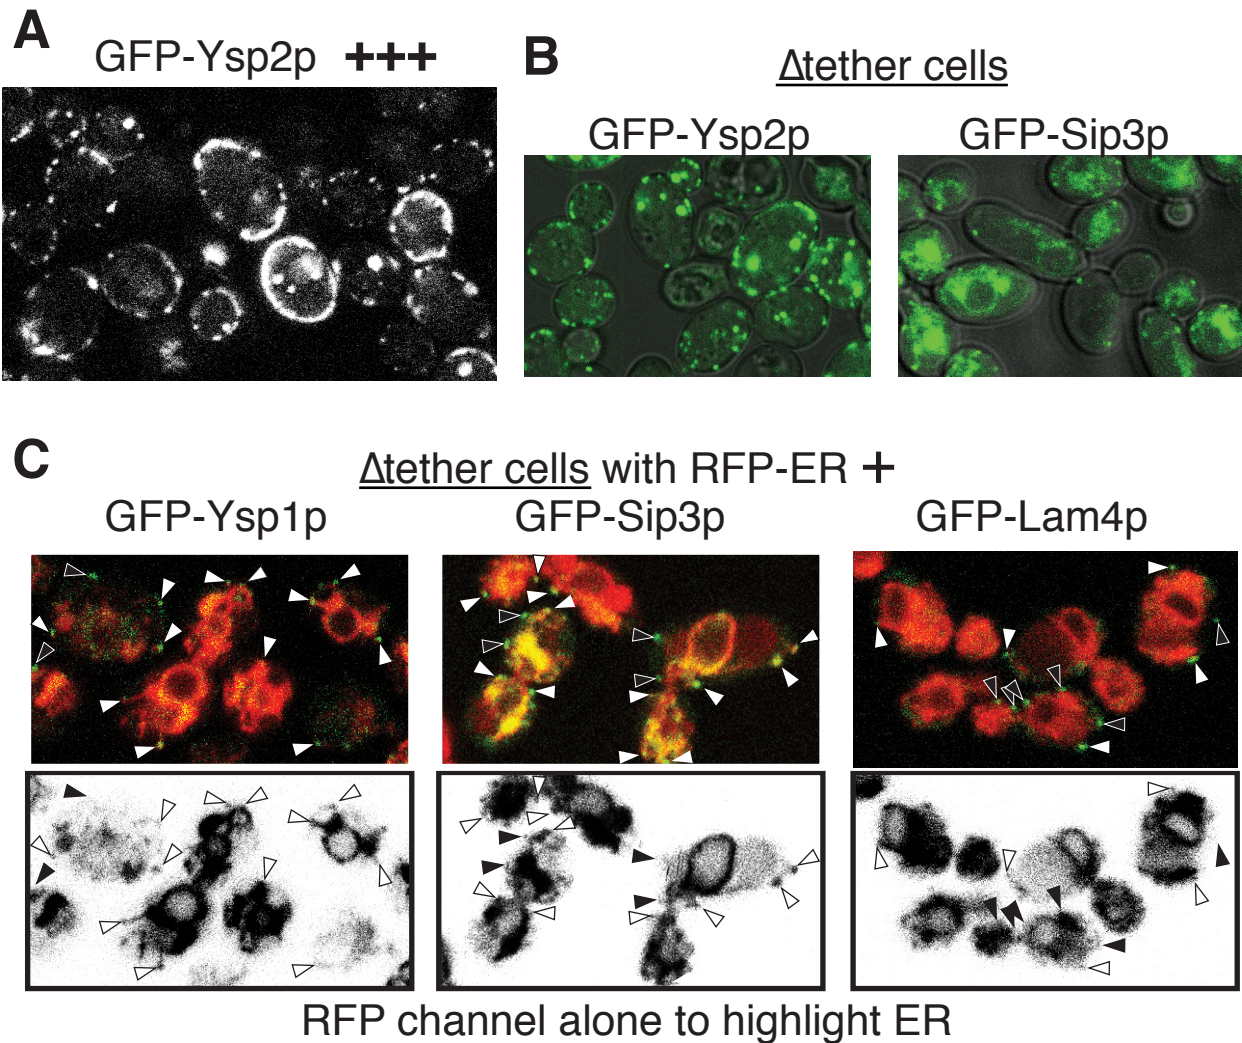

#### Figure 3-Figure Supplement 3: Ysp2p and its homologs target ER-PM contacts

**A.** GFP-Ysp2p expressed from the *GAL1* promoter after induction in galactose for 8 hrs. The distribution is largely unaffected by massive overexpression. **B.**  $\Delta$ tether cells expressing GFP-Ysp2p and GFP-Sip3p including the DIC channel to show where puncta are at cell peripheries. **C.**  $\Delta$ tether cells expressing RFP-ER and GFP-tagged Ysp1p/Sip3p/Lam4p. UPPER panels: colored merges; LOWER panels: inverted grey-scale images of RFP channel to indicate the extent of the ER. Arrows indicate all GFP+ve peripheral puncta, white if there is coincident RFP-ER, or black if not. ER was seen in ~70% of GFP puncta, which underestimates the degree of colocalization as GFP puncta are seen in more sections than the faint ER strands (see Figure 3C).
