# Supplementary material for: A new family of StART domain proteins at membrane contact sites has a role in ER-PM sterol transport
Source: eLife journal article supplement (doi:10.7554/elife.07253), 2015-05-21
Supplement: supp [file elife-07253-supp-v1.zip]

## Figure 4-Figure Supplement 1

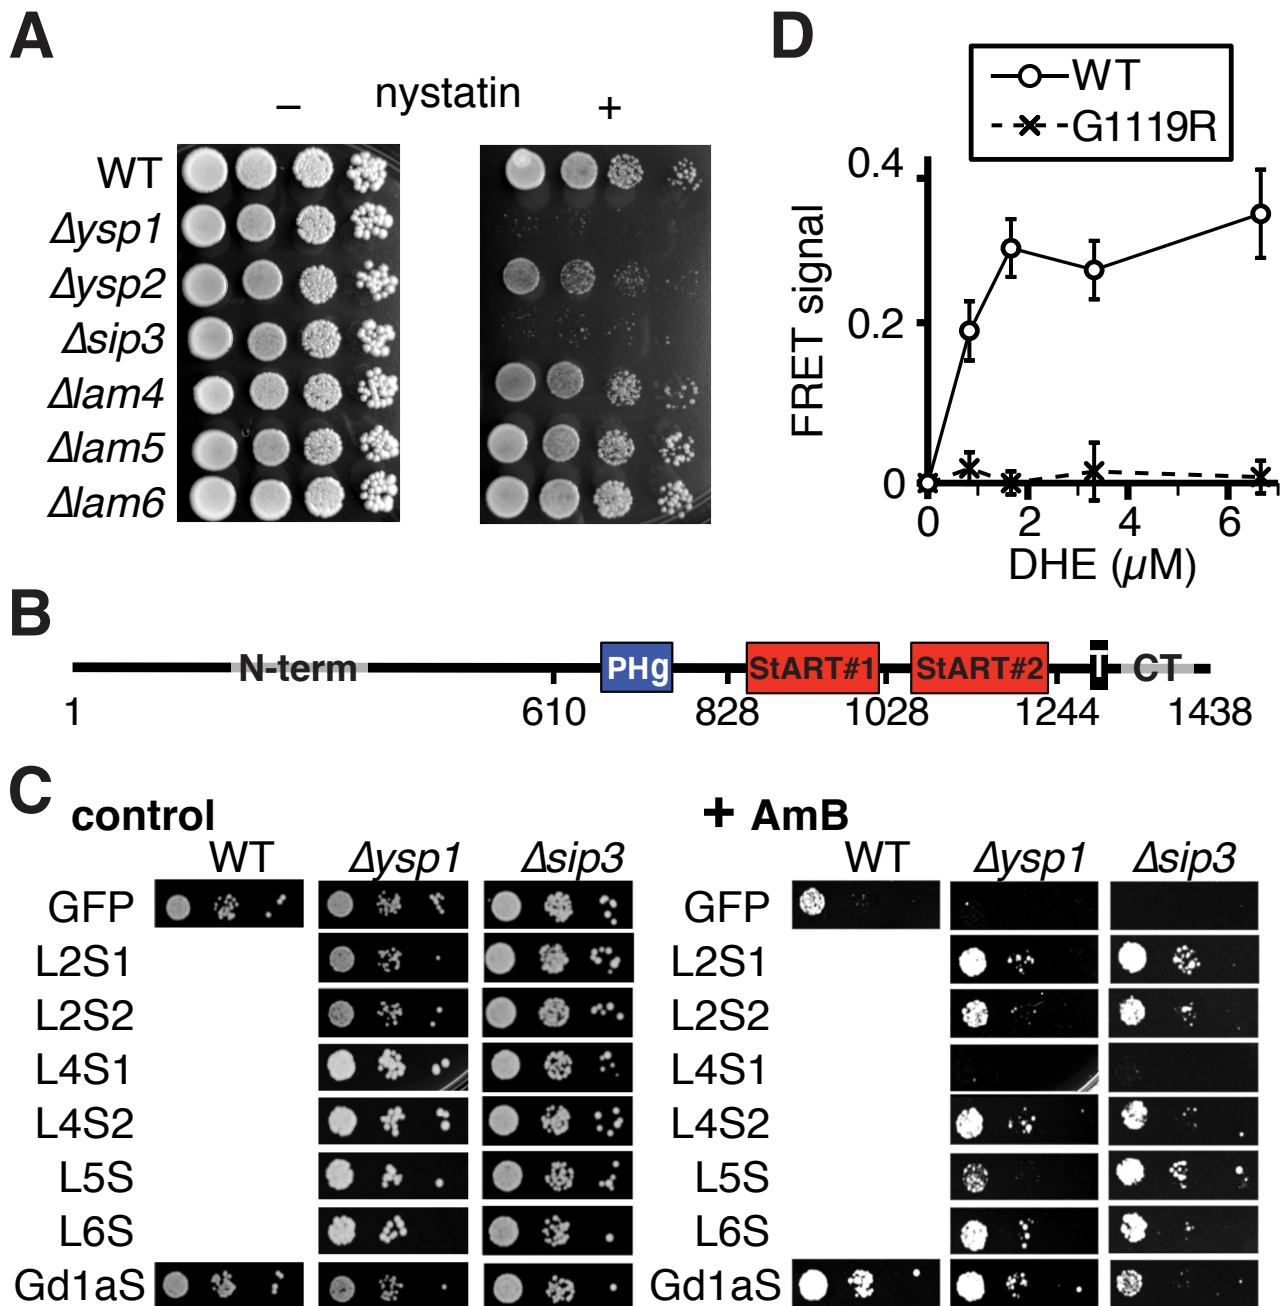

### Figure 4-Figure Supplement 1: Activities of different StART-like domains

**A.** Nystatin sensitivities of WT, and single deletions in  $\Delta ysp1/\Delta ysp2/\Delta sip3/\Delta lam4-6$  grown with and without nystatin (30  $\mu\text{g/ml}$ ). **B.** Diagram of domain boundaries in Ysp2 constructs used in Figure 4B and 4C. **C.** AmB sensitivities of WT,  $\Delta ysp1$  and  $\Delta sip3$  cells with plasmids expressing GFP alone or GFP tagged to seven StART-like domains (Lam2S1, Lam2S2, Lam4S1, Lam4S2, domains from Lam5, Lam6, and human GramD1a). LEFT: control plates to show cell number; RIGHT: plates with AmB 125 ng/ml. All domains were active except Lam4S1, which was less active in  $\Delta ysp2$ . **D.** Tryptophan-DHE FRET with constant concentration of wild-type or mutant (G1119R) Lam4S2 (1.05  $\mu\text{M}$ ) incubated with increasing concentrations of liposomes containing 30% DHE.
