# Supplementary material for: A new family of StART domain proteins at membrane contact sites has a role in ER-PM sterol transport
Source: eLife journal article supplement (doi:10.7554/elife.07253), 2015-05-21
Supplement: supp [file elife-07253-supp-v1.zip]

## Figure 3-Figure Supplement 1

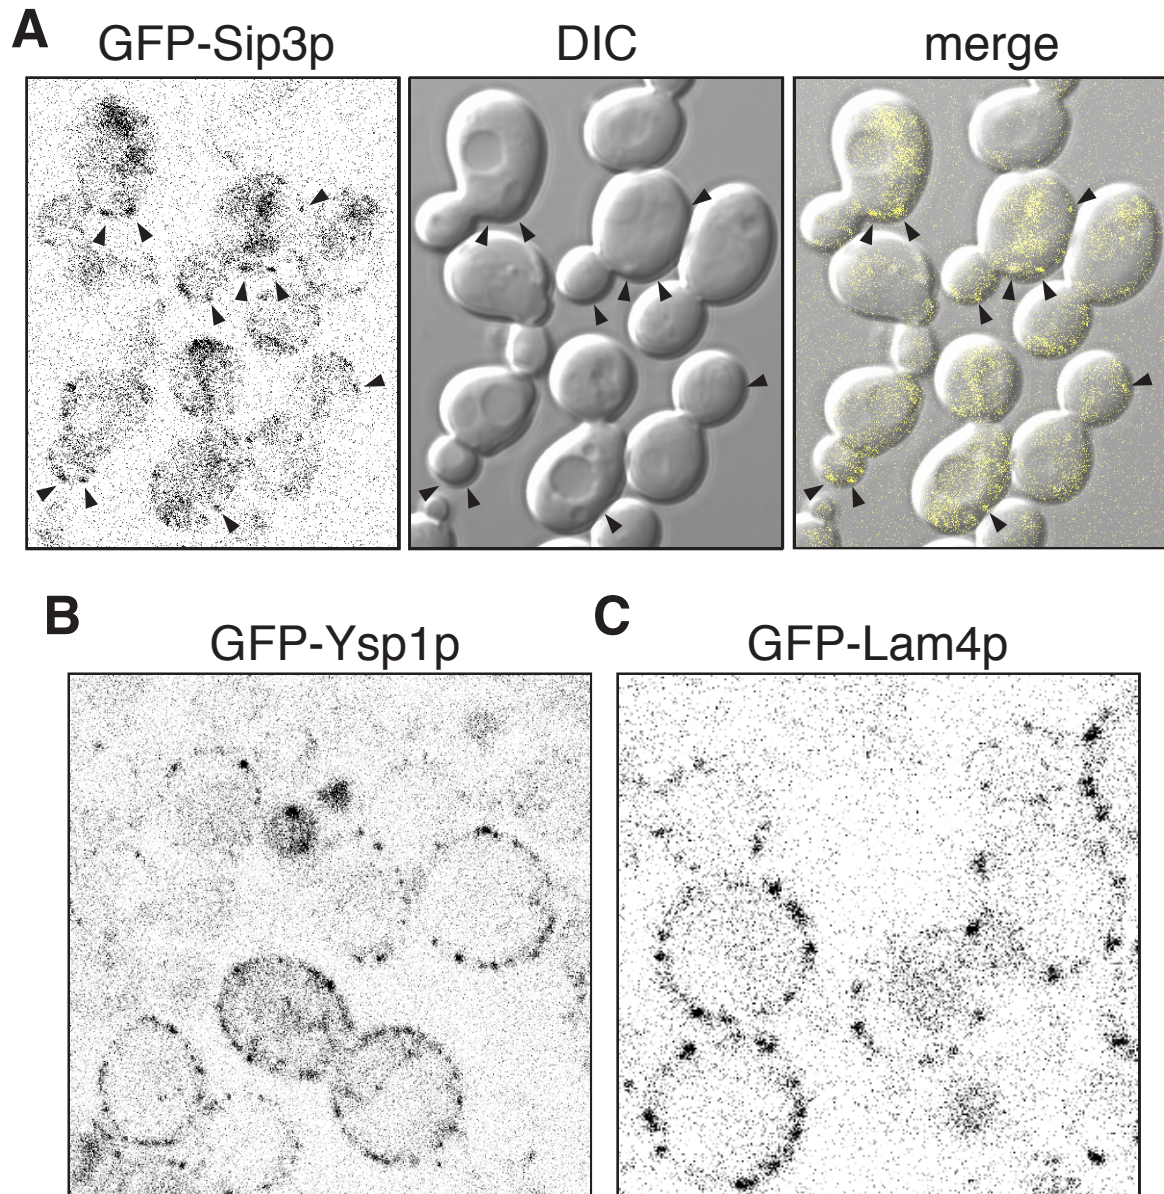

**Figure 3-Figure Supplement 1: Sip3p Ysp1p and Lam4p expressed from their own promoters**

**A. B. and C.:** Cells expressing plasmid borne N-terminally GFP-Sip3p, GFP-Ysp1p and GFP-Lam4p with their own promoters (inverted grey-scale). In A, Sip3p puncta are highlighted by arrowheads and also shown superimposed on DIC images of the same cells.
