# Supplementary material for: A new family of StART domain proteins at membrane contact sites has a role in ER-PM sterol transport
Source: eLife journal article supplement (doi:10.7554/elife.07253), 2015-05-21
Supplement: supp [file elife-07253-supp-v1.zip]

## Figure 5-Figure Supplement 1

### Control plates (no AmB) from Figure 5

**A**

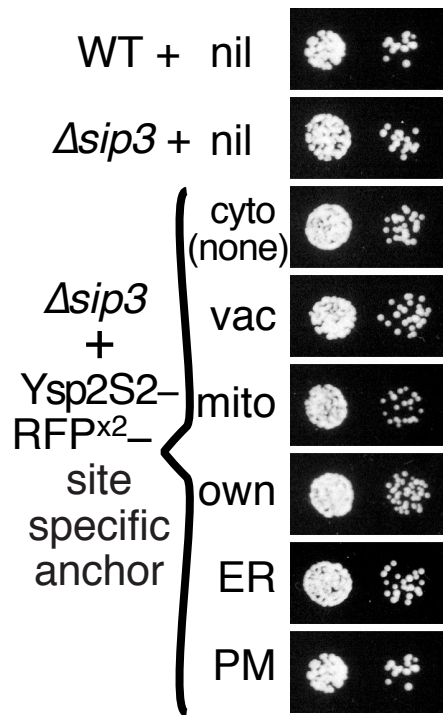

**B**

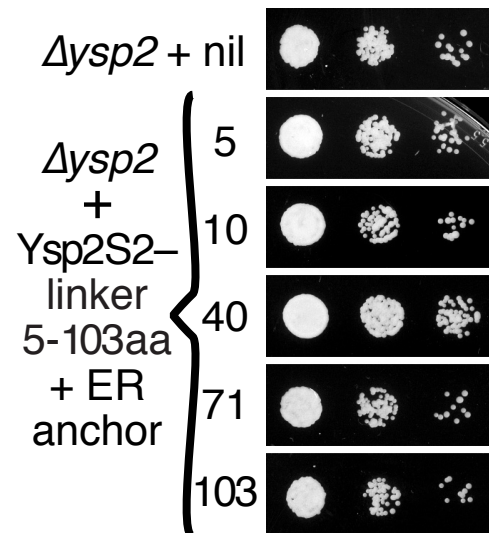

#### Figure 5– Figure Supplement 1: Controls for tests of LAM domain function at ER-PM contacts

Cells from Figure 5 were also plated on control plates (no AmB) to indicate whether the cell number was equal throughout.
