# Supplementary material for: A new family of StART domain proteins at membrane contact sites has a role in ER-PM sterol transport
Source: eLife journal article supplement (doi:10.7554/elife.07253), 2015-05-21
Supplement: supp [file elife-07253-supp-v1.zip]

**Figure 6 - Figure Supplement 1**

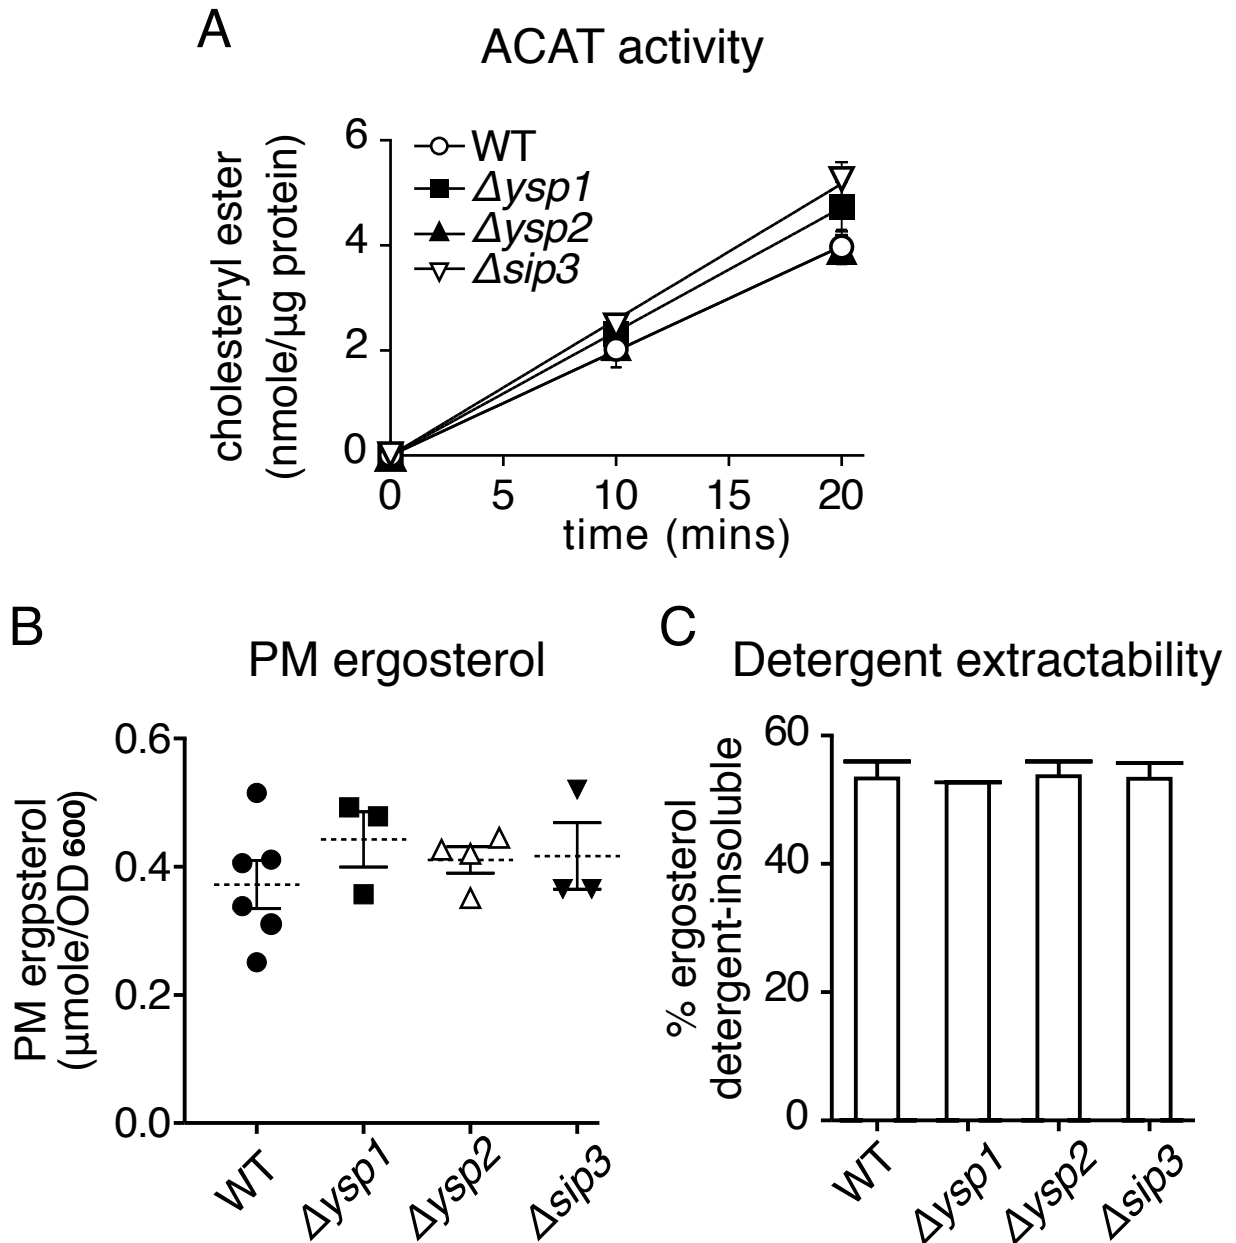

**Figure 6 - Figure Supplement 1: Strains lacking Ysp1p Ysp2p or Sip3p have no significant changes in sterol handling**

**A.** ACAT activity producing sterol esters was measured in microsomes prepared from cell homogenates of the indicated strains over a 20 minute period. Activity was marginally increased in  $\Delta yap1$  and  $\Delta sip3$  cells. **B.** Ergosterol was measured in PM fractions obtained by sucrose gradient centrifugation of lysates from the indicated strains. PM ergosterol was not significantly changed in  $\Delta yap1$ ,  $\Delta yap2$  and  $\Delta sip3$  strains compared to wild-type. **C.** The proportion of total cellular sterol that partitions into detergent-insoluble complexes was measured. This was unaltered in  $\Delta yap1$ ,  $\Delta yap2$  and  $\Delta sip3$  strains compared with wild-type cells.
